# Supplementary material
Source: publisher figshare collection journal article supplement (https://diabetesjournals.figshare.com/ndownloader/files/35161282)
Supplement: Supplementary file 1 [file 35161282]

## Supplementary Figure Legends

### Supplementary Figure 1. Metabolic stress induces intracellular hypoxia and HIF-2 $\alpha$

**expression in Min6 cells.** (A) IHC analysis of insulin (green) and HIF-2 $\alpha$  (magenta) expression in pancreatic islets of tamoxifen-treated WT and HIF-2 $\alpha$   $\beta$ KO mice fed HFD (ad libitum). Even with increased camera exposure, we did not detect significant amount of nuclear HIF-2 $\alpha$  in the beta cells of HIF-2 $\alpha$   $\beta$ KO mice. (B) Relative HIF-1 $\alpha$  and HIF-2 $\alpha$  band intensity normalized to Actin in Figure 1E and two additional independent repeat experiments with the same experimental conditions. (C) Pimonidazole adduct formation was assessed using immunocytochemistry analysis of Min6 cells incubated in low (2.8 mM) and high (16.8 mM) glucose conditions in the presence or absence of 100  $\mu$ M palmitic acid for 24h. Cells were treated with 10  $\mu$ M pimonidazole (Hypoxypore-1 plus; Hypoxypore Inc, Burlington, USA) 30 min before harvesting the cells. Fixed cells were stained with FITC-conjugated anti-pimonidazole adduct antibodies (green) and images were acquired using confocal microscopy (20X). (D) Relative pimonidazole adduct staining intensity was normalized by the number of nuclei (DAPI-positive) in a given area of images from the panel C experiments. Results were plotted and presented. Grey bars, 2.8 mM glucose; open bars, 16.8 mM glucose; PA, palmitic acid. Throughout, \* $P$ <0.05, \*\* $P$ <0.01, and \*\*\*\* $P$ <0.001. All data are presented as mean  $\pm$  SEM. Statistical analysis was performed by the 2-way ANOVA with Tukey's multiple comparison tests.

### Supplementary Figure 2. Inducible depletion of beta cell HIF-2 $\alpha$ in adult mice does not

**affect GSIS and glucose tolerance on NCD.** H2 $\beta$ KO<sup>MIP</sup>, H2 $\beta$ KO<sup>PDX1</sup>, Cre<sup>-/-</sup>:Hif2a<sup>fl/fl</sup> littermate control, and age-matched MIP-CreERT mice were fed NCD. At the age of 20 weeks, mice were

fed a tamoxifen-containing NCD for 1 week. At the age of 21 week, diet was switched back to NCD. After 2 weeks of recovery on NCD, mice were subjected to OGTTs. **(A)** Schematic representation of experimental time line. **(B-D)** mRNA (B and D) and protein (C) expression of *Hif1a* and *Hif2a* in the islets from H2 $\beta$ KO<sup>MIP</sup>, *Cre*<sup>-/-</sup>:*Hif2a*<sup>fl/fl</sup> littermate control, and age-matched MIP-CreERT mice or H2 $\beta$ KO<sup>PDX1</sup> and *Cre*<sup>-/-</sup>:*Hif2a*<sup>fl/fl</sup> littermate control mice (n= 5 mice per group in panel B and D and n=3 mice in panel C). Set 1~3 results in panel C represents three independent experiments using islets from one WT and one KO mice in each. To induce HIF-2 $\alpha$  expression, isolated islets were incubated in a normoxia (21% oxygen; Norm) or hypoxia (1% oxygen; Hypo) condition for 6 h and subjected to Western blot analyses. **(E-F)** body weight in H2 $\beta$ KO<sup>MIP</sup>, *Cre*<sup>-/-</sup>:*Hif2a*<sup>fl/fl</sup> littermate control, and age-matched MIP-CreERT mice (E; n= 6, 7, and 6 mice per group) or in the islets from H2 $\beta$ KO<sup>PDX1</sup> and *Cre*<sup>-/-</sup>:*Hif2a*<sup>fl/fl</sup> littermate control mice (F; n= 18 and 44 mice per group). **(G)** Oral glucose tolerance tests (n= 6, 7, and 7 mice per group). **(H)** Plasma insulin levels during OGTT in panel G mice. **(I)** Plasma C-peptide levels during OGTT in panel G mice. **(J)** Oral glucose tolerance tests (n= 9 and 9 mice per group). **(K-R)** Islet morphology analysis in pancreatic sections of HFD MIP-CreERT (K), H2 $\beta$ KO<sup>MIP</sup> (K), *Cre*<sup>-/-</sup>:*Hif2a*<sup>fl/fl</sup> (L), and H2 $\beta$ KO<sup>PDX1</sup> (L) mice after immune-staining with anti-insulin and anti-glucagon antibodies. More than four mice were used for the analysis of islet morphology in each group and representative figures are shown. **(M, O)** Relative beta cell mass (n= 5, 3, and 4 mice per group in panel M and 5 and 4 mice in panel O). **(N, P)** Islet number per pancreatic section area (n= 4, 3, and 4 mice per group in panel N and 4 and 4 mice in panel P). **(Q, R)** Pancreatic mass (n= 7, 5, and 4 mice per group in panel Q and 7 and 4 mice in panel R). **(S)** *Ex vivo* static GSIS tests in isolated islets (n=5, 5, 10, and 10 mice per group). Throughout, \**P*<0.05. All data are presented as mean  $\pm$  SEM. Statistical analysis was performed by the 2-way ANOVA with Tukey's multiple comparison tests.



**Supplementary Figure 3. Analysis of primary islets from HFD HIF-2 $\alpha$  beta cell KO and control mice.**

(A) Time course changes in body weight in WT and  $\beta$ KO<sup>MIP</sup> mice during 12 weeks of HFD. (B) Area under the curve (AUC) during OGTTs in Figure 2D. (C) Intra-islet insulin content in HFD MIP-CreERT, H2 $\beta$ KO<sup>MIP</sup>, *Cre*<sup>-/-</sup>:*Hif2a*<sup>fl/fl</sup>, and H2 $\beta$ KO<sup>PDX1</sup> mice (n=5, 5, 10, and 10 mice per group). (D) *Ex vivo* static GSIS tests in isolated islets (n=45, 24, and 24 wells per group for WT islets and 24, 12, and 12 wells per group for KO islets). (E) Islet number per pancreatic section area in HFD H2 $\beta$ KO<sup>MIP</sup>, *Cre*<sup>-/-</sup>:*Hif2a*<sup>fl/fl</sup> littermate control mice, and age-matched MIP-CreERT mice (n= 7, 2, and 7 mice per group). (F) Islet number per pancreatic section area in HFD H2 $\beta$ KO<sup>PDX1</sup> and *Cre*<sup>-/-</sup>:*Hif2a*<sup>fl/fl</sup> littermate control mice (n= 9 and 8 mice per group). (G) Average beta cell size was calculated by dividing total insulin-positive beta cell area by the number of beta nuclei in each islet (n= 7, 2, 4, and 8 mice per group). (H) The proportion of alpha cell area was calculated by dividing total glucagon-positive alpha cell area by total islet area (alpha cell + beta cell area) in each of the islets (n= 7, 2, 4, and 8 mice per group). (I) The ratio of alpha:beta cells was calculated by dividing the number of glucagon-positive cell nuclei by the number of insulin-positive cell nuclei (n= 7, 2, 4, and 8 mice per group; two islets were randomly selected from each mouse section and the alpha:beta ratios in the two islets were averaged. This average ratio was considered as the representative alpha:beta ratio of each mouse). Throughout, \**P*<0.05 and \*\**P*<0.01. All data are presented as mean  $\pm$  SEM. Statistical analysis was performed by unpaired t-test (B) or the 2-way ANOVA with Tukey's multiple comparison tests.

**Supplementary Figure 4. *Hif1a* and *Arnt* expression, Arnt-HIF-1 $\alpha$  interaction, and/or ROS levels in HIF-2 $\alpha$  or HIF-1 $\alpha$  KD Min6 cells.**

(A) *Hif1a* expression in Min6 cells transfected with mock or *Hif2a*-specific siRNAs. 24h after transfection, cells were incubated in low (2.8 mM) or high (16.8 mM) glucose media for 48h. (B) Western blot analysis of HIF-1 $\alpha$  and HIF-2 $\alpha$

expression in control and HIF-2 $\alpha$  KD Min6 cells incubated in low or high glucose media for 24h in the presence or absence of MitoTEMPO. Results from two additional independent experiments performed in the same condition with Figure 3C are shown. These results were used to plot relative HIF-1 $\alpha$  and HIF-2 $\alpha$  expression in Figure 3C (right). **(C)** Western blot analysis of HIF-1 $\alpha$  and HIF-2 $\alpha$  expression in control and HIF-2 $\alpha$  KD Min6 cells incubated in low or high glucose media for 24h. Results from three independent experiments are shown. The relative ratio of HIF-1 $\alpha$  to Actin expression was calculated and presented on the right. **(D)** Immunoprecipitation (IP) Western blot analysis of Arnt-associated HIF-1 $\alpha$  and HIF-2 $\alpha$  expression in control and HIF-2 $\alpha$  KD Min6 cells. Min6 cells were incubated in 2.8 mM or 16.8 mM glucose media for 24h. Total lysates were prepared and subjected to IP experiments with anti-Arnt antibody (Novus, Cat. #NB100-124SS)-coated or control beads (Thermo, Cat. #10003D). Samples were analyzed by Western blots with anti-Arnt, anti-HIF-1 $\alpha$ , and anti-HIF-2 $\alpha$  antibodies. **(E)** Mitochondrial ROS levels in Min6 cells transfected with mock or *Hif2a*-specific siRNAs. 24h after transfection, cells were incubated in low (2.8 mM) or high (16.8 mM) glucose media for 24h. **(F)** Cytosolic ROS levels in Min6 cells transfected with mock or *Hif2a*-specific siRNAs. 24h after transfection, cells were incubated in low (2.8 mM) or high (16.8 mM) glucose media for 24h. **(G)** Immuno-fluorescence cytochemistry analysis of Tom20-positive area in control and HIF-2 $\alpha$  KD Min6 cells incubated in low or high glucose media in the presence or absence of MitoTEMPO. Relative Tom20-positive area was calculated and plotted in Figure 5F. **(H)** Intracellular ROS levels. Min6 cells were transfected with mock or *Hif1a*-specific siRNAs. 24h later, cells were incubated in high glucose (16.8 mM) media for another 24 h in the presence or absence of PHDi. Throughout, \* $P$ <0.05, \*\* $P$ <0.01, and \*\*\*\* $P$ <0.001. All data are presented as mean  $\pm$  SEM. Statistical analysis was performed by the 2-way ANOVA with Tukey's multiple comparison tests.

**Supplementary Figure 5. DNA sequence motif analysis for the presence of putative hypoxia response element (HRE) in human and mouse *SOD2* and *CAT* gene promoter regions.** DNA sequences 2 kb upstream from the transcription start site of human and mouse *SOD2* and *CAT* genes were used to identify putative HREs using a web-based open-access DNA sequence motif analyzing algorithm, JASPAR. In this analysis, each of the motifs of candidate TF binding sites were assigned scores by the position weight matrix for the given sequence (Doi: 10.1093/nar/gkz1001)

**Supplementary Figure 6. Schematic model of how HIF-2 $\alpha$  supports beta cell compensation in obesity.**

**A**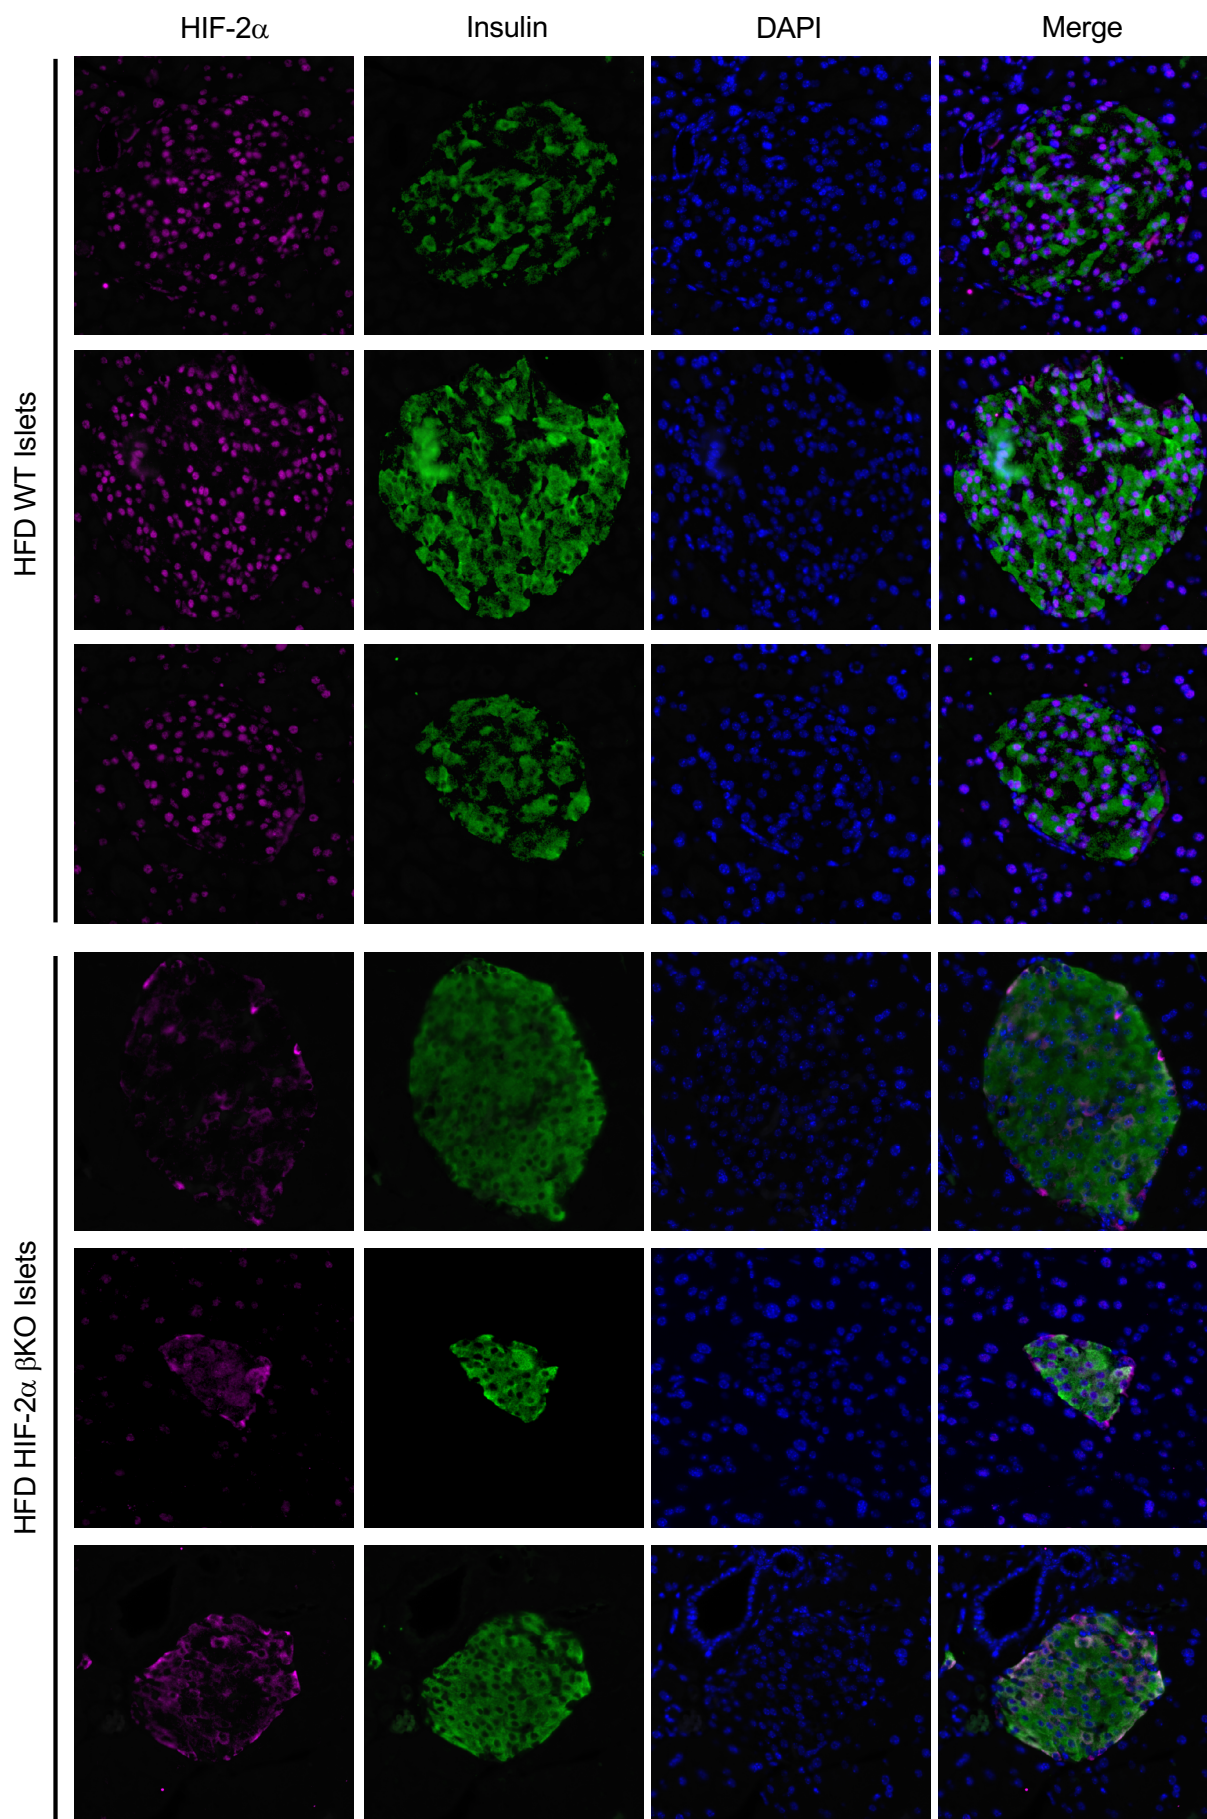**Supplementary Figure 1**

**B**

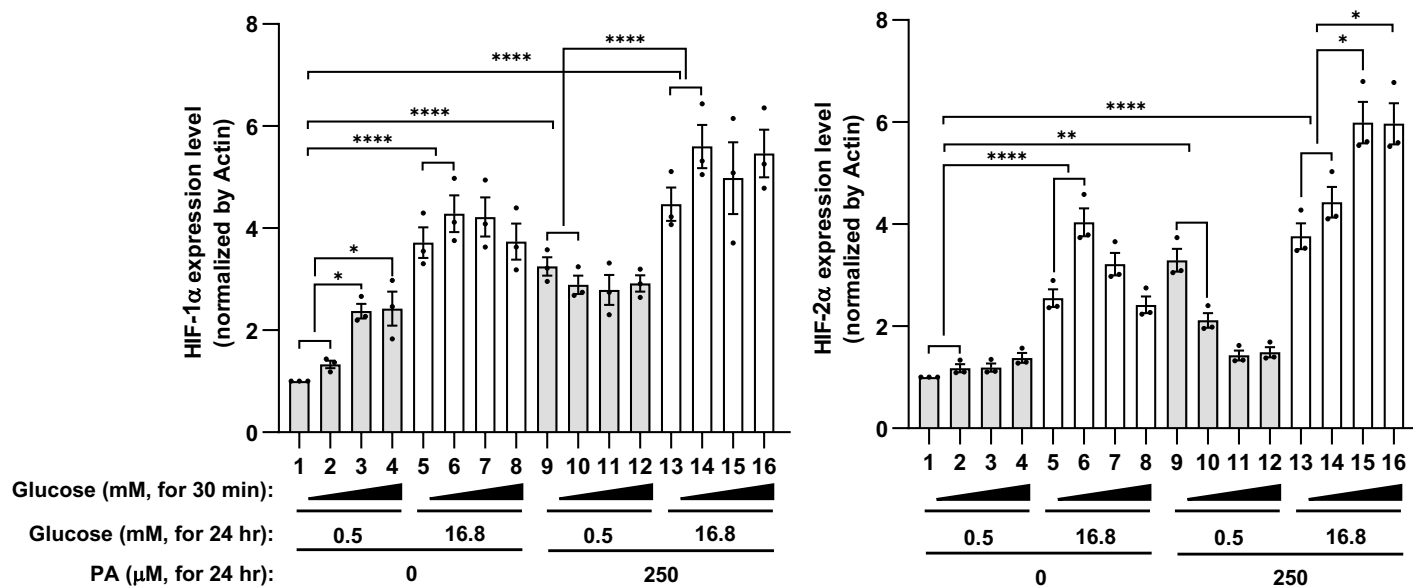

**C**

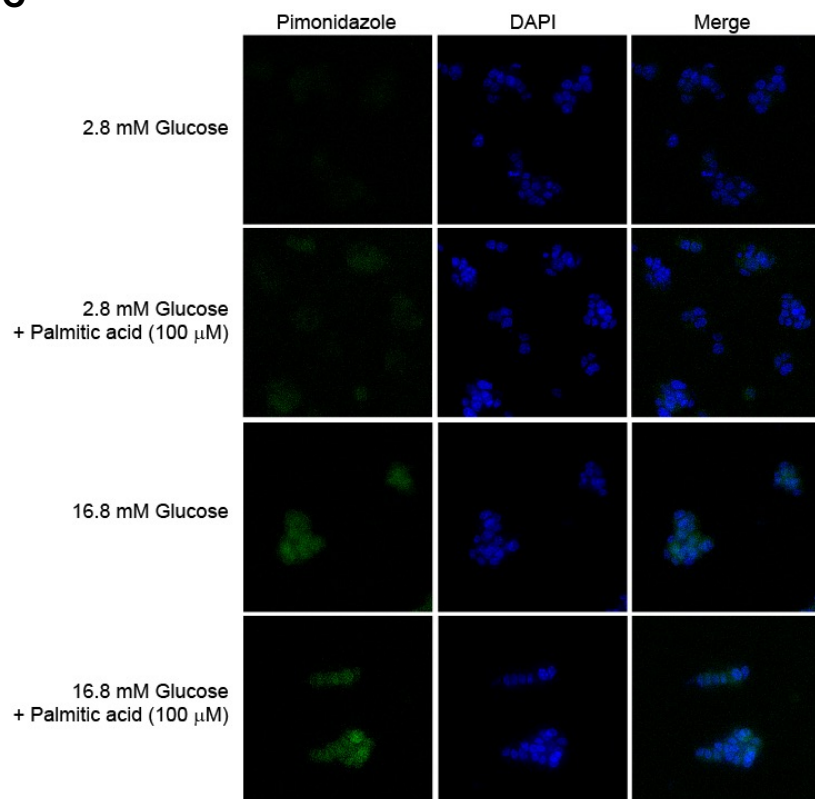

**D**

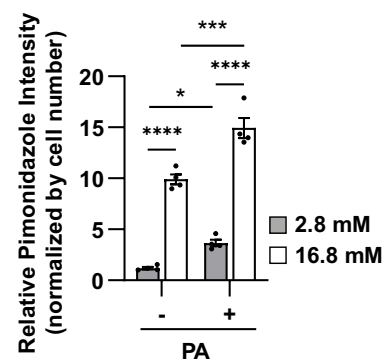



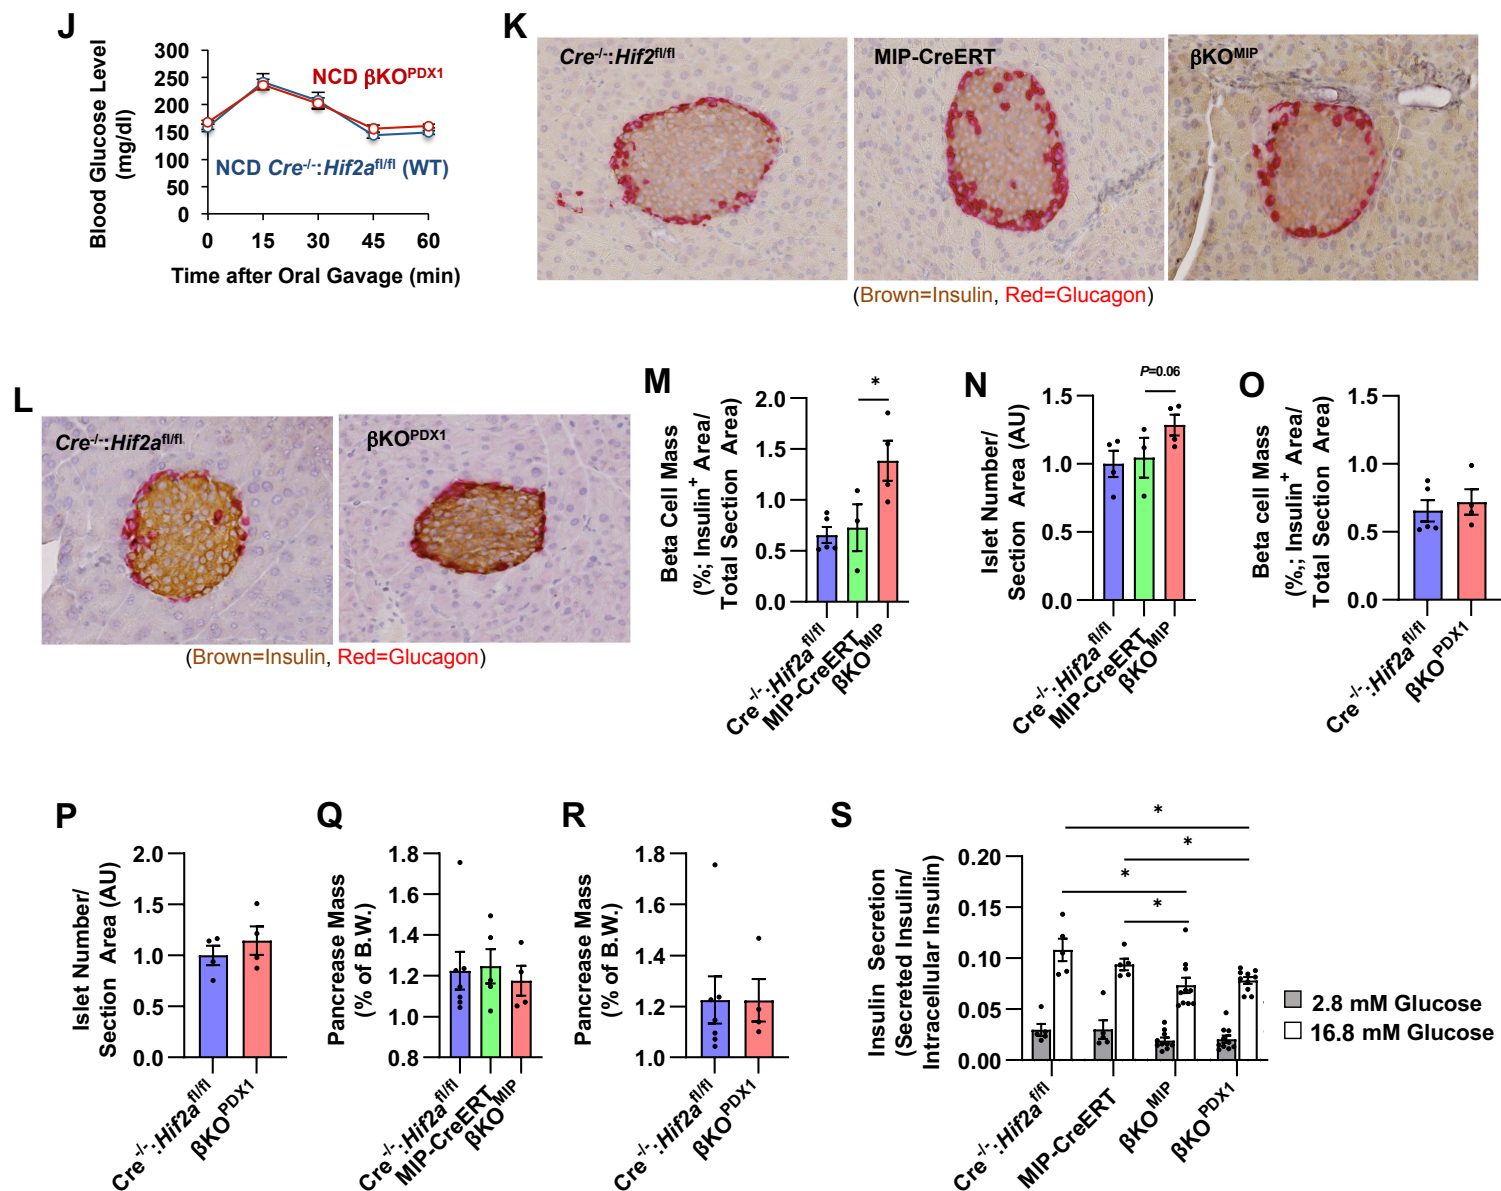

Supplementary Figure 2



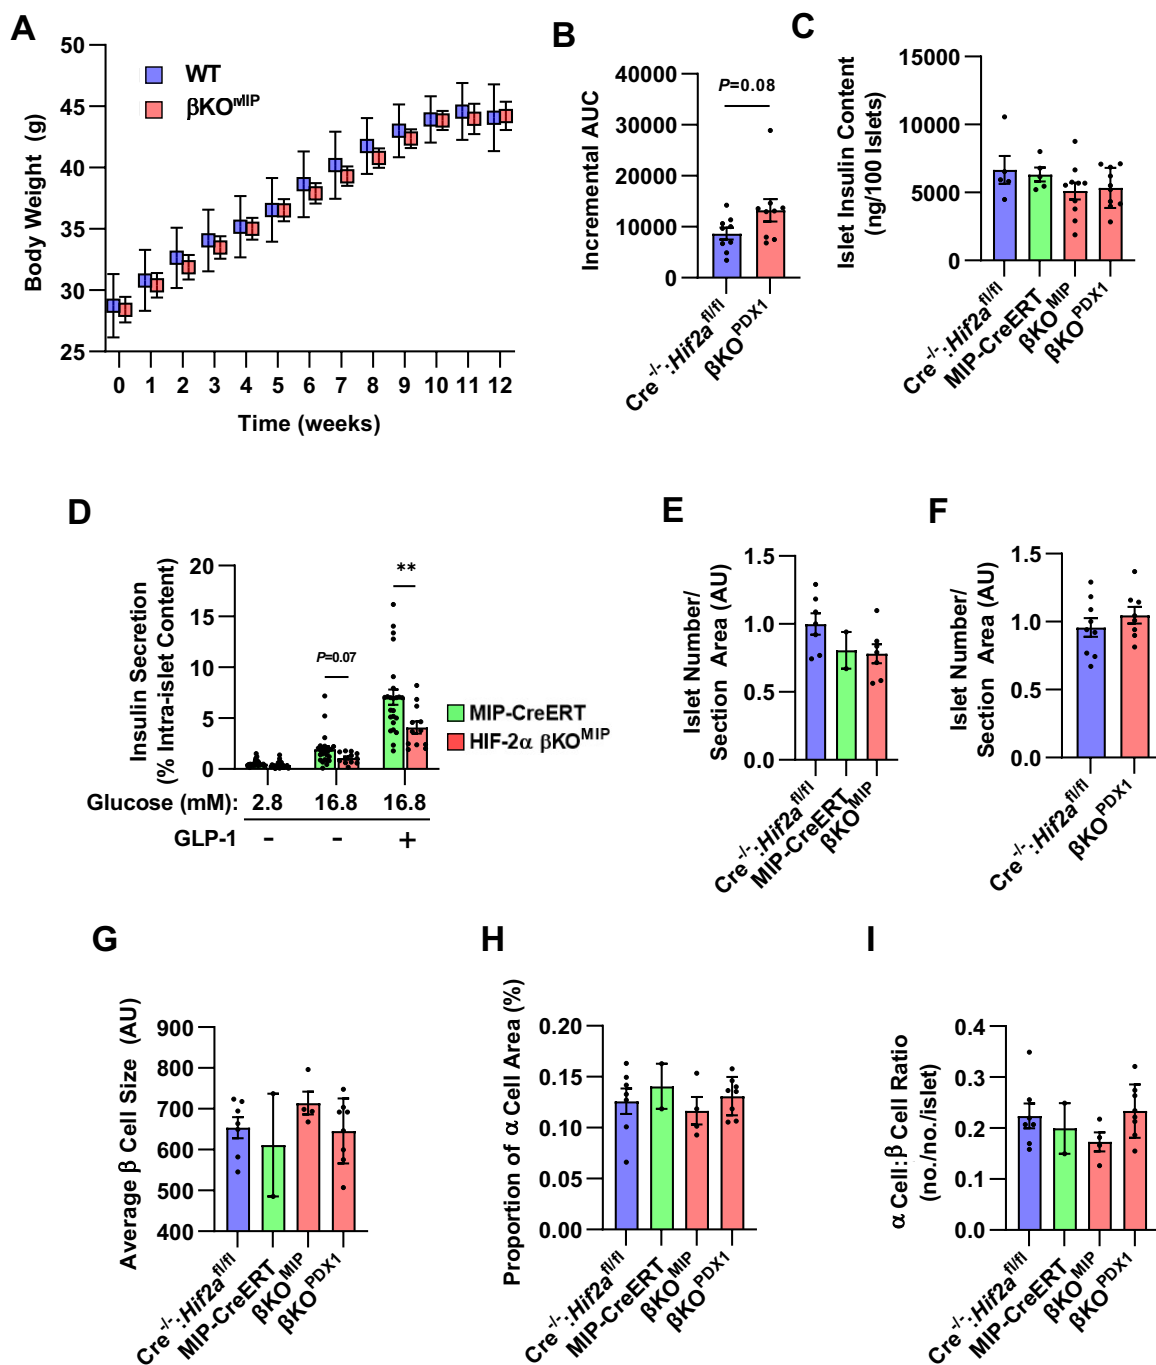

Supplementary Figure 3



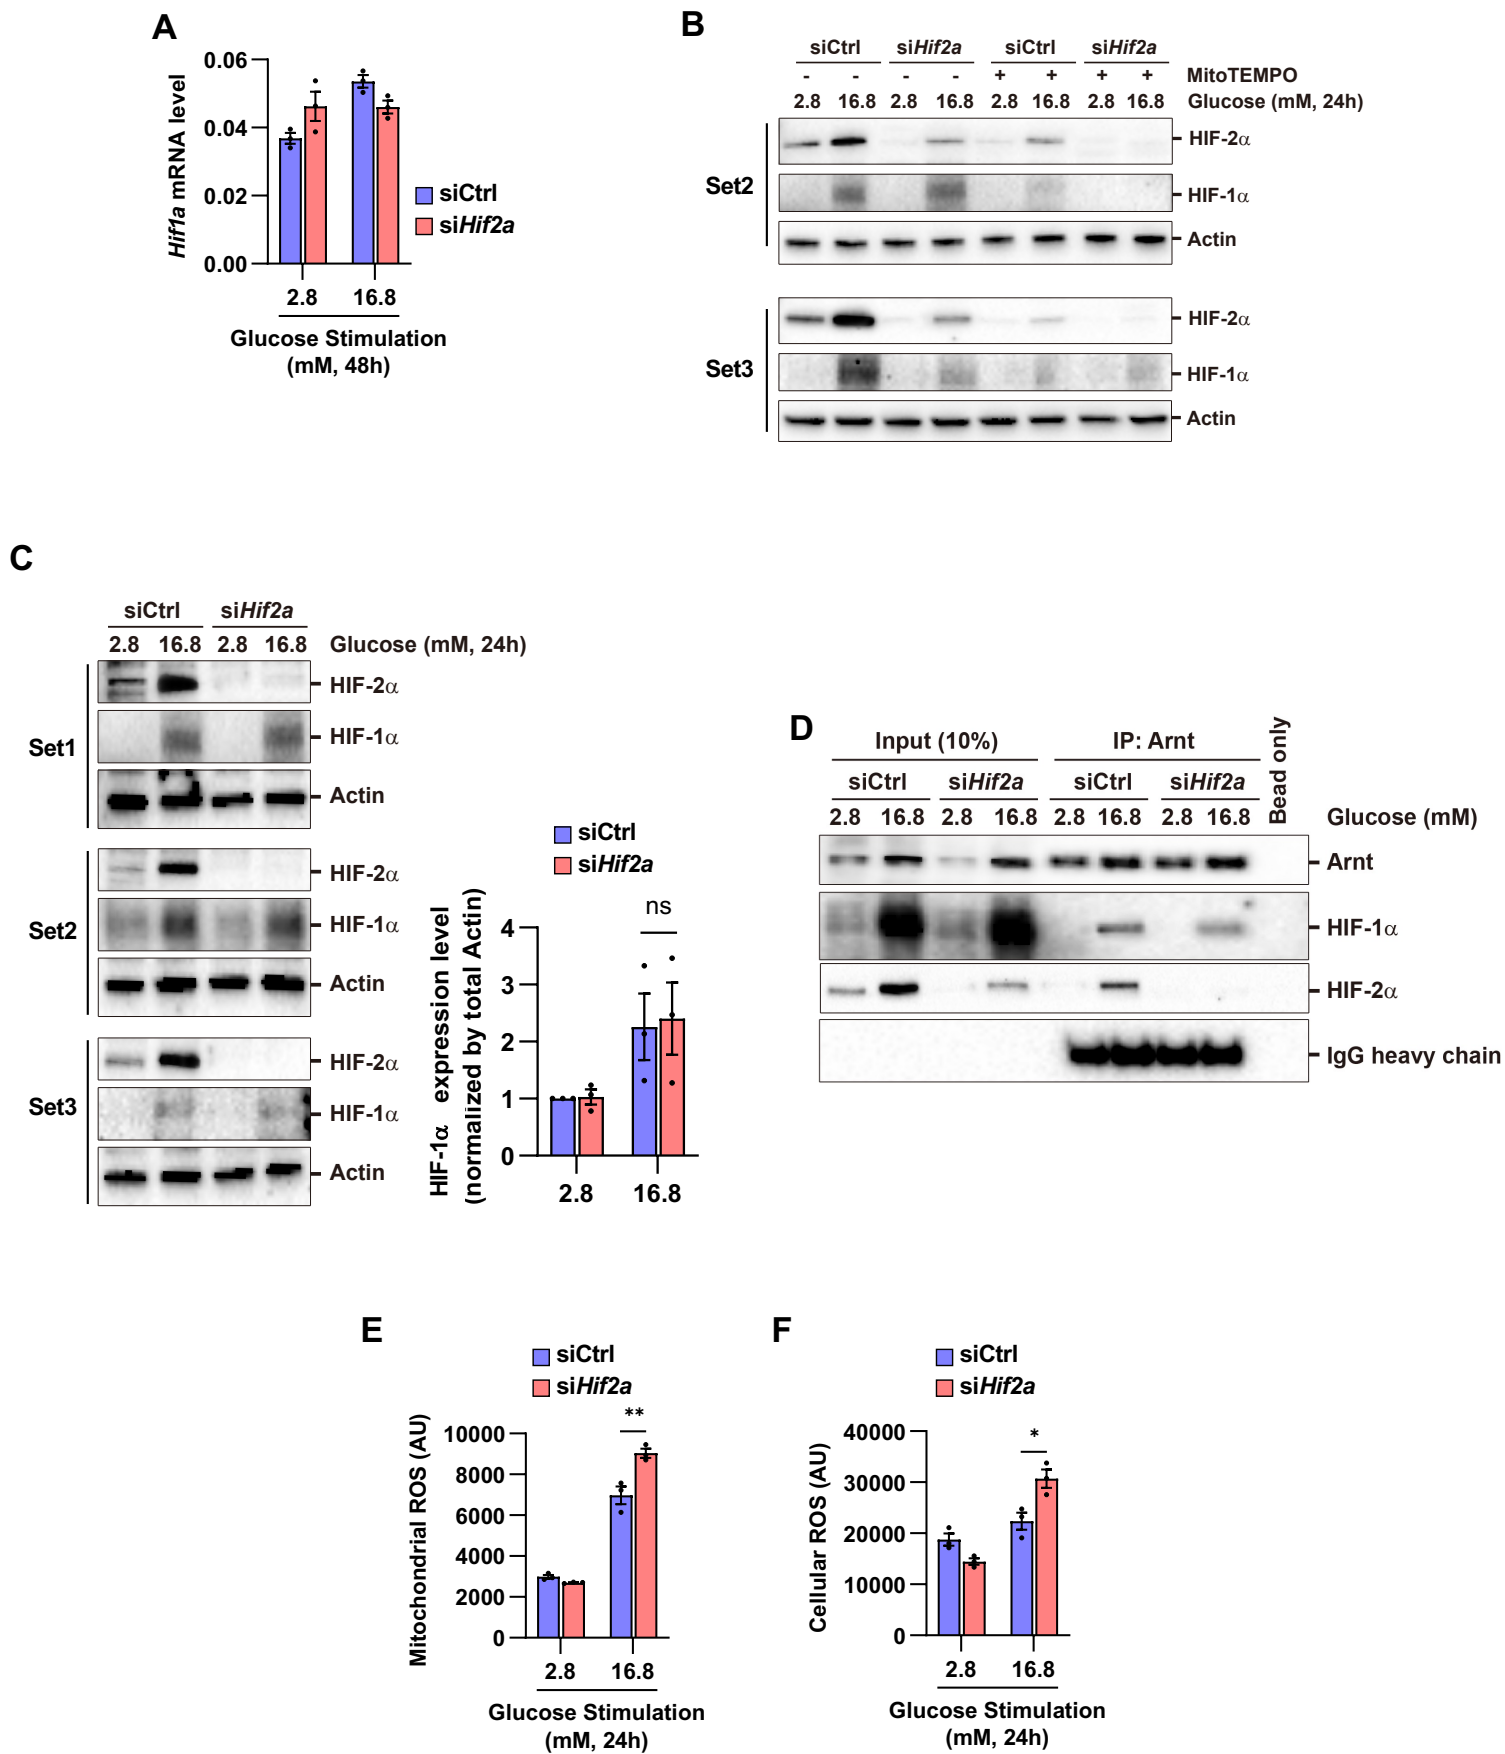

Supplementary Figure 4

**G**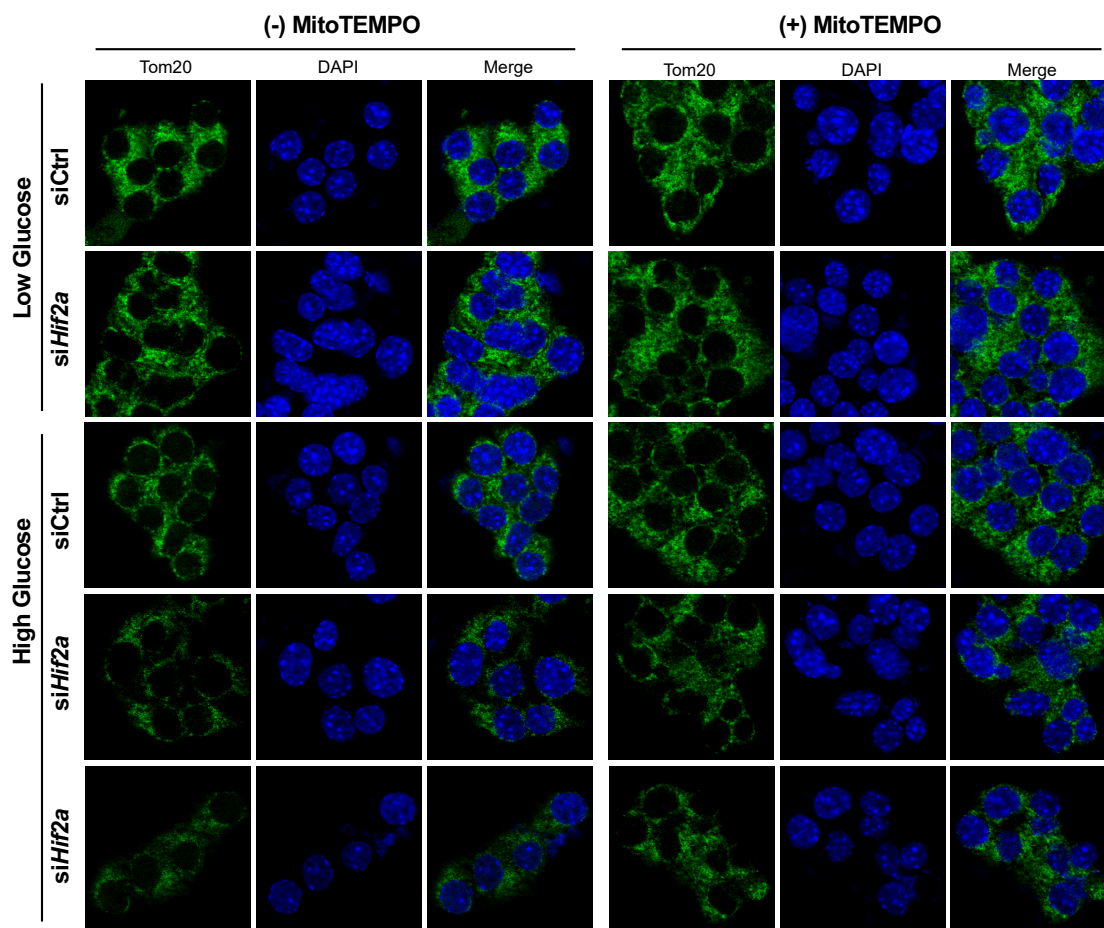**H**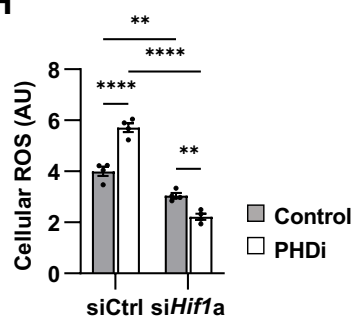

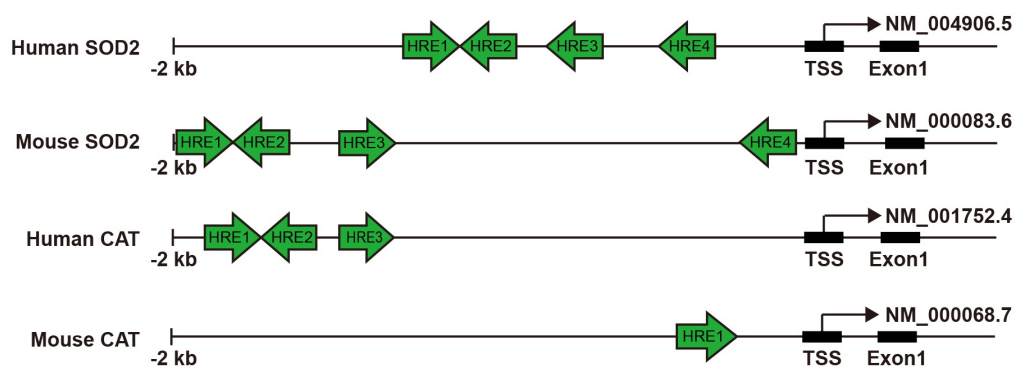

Putative HREs in human and mouse SOD and CAT gene promoters

| Target | Species | Putative HRE | DNA Sequence | Position (from TSS) | Score | Strand |
|--------|---------|--------------|--------------|---------------------|-------|--------|
| SOD2   | Human   | HRE1         | GGGCGTGG     | -1435 to -1427      | 8.29  | +      |
|        |         | HRE2         | AGGCGTGc     | -1423 to -1416      | 8.93  | -      |
|        |         | HRE3         | CTACGTGT     | -1214 to -1207      | 8.71  | -      |
|        |         | HRE4         | CGACGTGc     | -621 to -613        | 10.44 | -      |
|        | Mouse   | HRE1         | AGGCGTGT     | -2124 to -2116      | 7.13  | +      |
|        |         | HRE2         | GGGCGTGG     | -2112 to -2106      | 8.29  | -      |
|        |         | HRE3         | ATACGTGc     | -1669 to -1661      | 10.27 | +      |
|        |         | HRE4         | CCGCGTGC     | -26 to -18          | 8.57  | -      |
| CAT    | Human   | HRE1         | AGGCGTGT     | -1960 to -1952      | 7.13  | +      |
|        |         | HRE2         | GGGCGTGG     | -1948 to -1940      | 8.29  | -      |
|        |         | HRE3         | AGGCGTGA     | -1825 to -1817      | 7.35  | +      |
|        | Mouse   | HRE1         | CGTCTGTC     | -598 to -590        | 5.94  | +      |

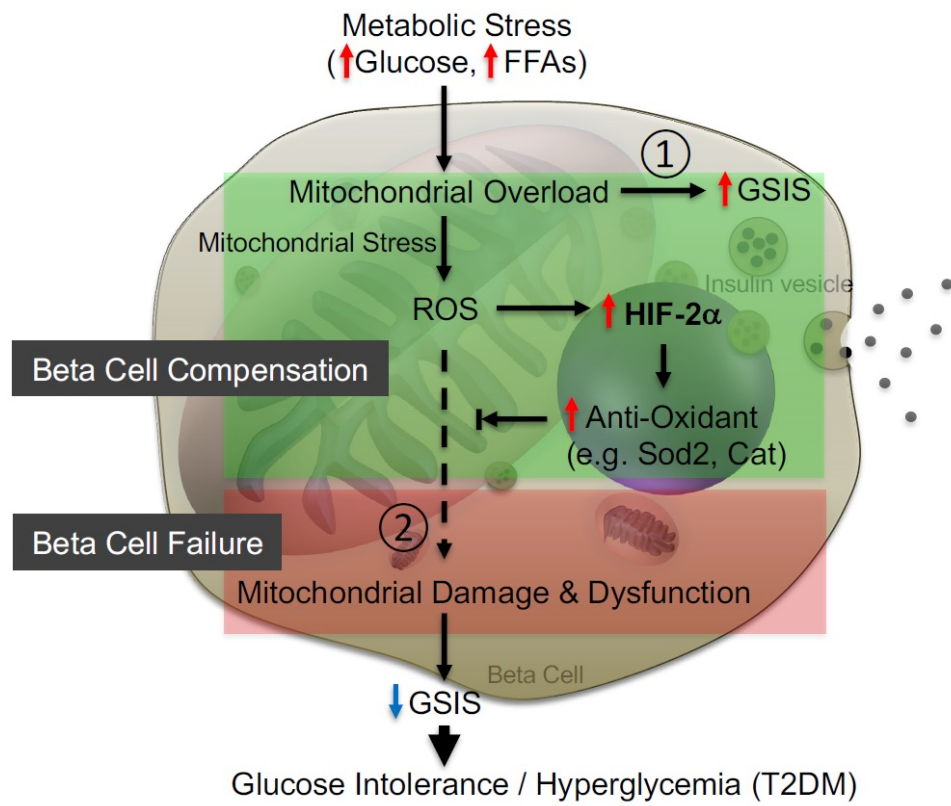

**Supplementary Table 1. Primers used for qRT-PCR analysis**

|               | <b>Genes full name</b>                                               | <b>Forward primer, 5' - 3'</b> | <b>Reverse primer, 5' - 3'</b> |
|---------------|----------------------------------------------------------------------|--------------------------------|--------------------------------|
| <i>Hif1a</i>  | Hypoxia-inducible factor 1-alpha                                     | CAAGATCTCGGCGAAGCAA            | GGTGAGCCTCATAACAGAAGCTTT       |
| <i>Hif2a</i>  | Hypoxia-inducible factor 2-alpha                                     | TAAAGCGGCAGCTGGAGTAT           | ACTGGGAGGCATAGCACTGT           |
| <i>Slc2a1</i> | Solute carrier family 2, facilitated glucose transporter member 1    | GCAGGAGTGTCCGTGTCTTC           | CCTGTCTCTTCTACCCAACC           |
| <i>Slc2a2</i> | Solute carrier family 2, facilitated glucose transporter member 2    | ATGTCGGTGGGACTTGTGCT           | TGGACCTGGCCCAATCTCAA           |
| <i>Pdk1</i>   | Polycystin-1                                                         | GGACTTCGGGTCACTGAATGC          | TCCTGAGAAGATTGTGCGGGA          |
| <i>Ldha</i>   | Lactate dehydrogenase A                                              | CACTGCAAGCTGCTGATCGT           | CCAGCCTCTCTCCCATCAGG           |
| <i>Pgc1</i>   | Peroxisome proliferator-activated receptor gamma coactivator 1-alpha | GAAAGGGCCCCGAGCAATCTG          | TCACCAAACAGCCGGAGACT           |
| <i>Tfam</i>   | Transcription factor A, mitochondrial                                | AGCGTGCTAAAAGCACTGGG           | ATAGACGAGGGGATGCGACC           |
| <i>Nrf1</i>   | Nuclear respiratory factor 1                                         | AGCACGGAGTGACCCAAAC            | AGGATGTCCGAGTCATCATAAGA        |
| <i>Nrf2</i>   | Nuclear respiratory factor 2                                         | CTTTAGTCAGCGACAGAAGGAC         | AGGCATCTTGTGTTGGGAATGTG        |
| <i>Gpx</i>    | Glutathione peroxidase 1                                             | CACAGTCCACCGTGTATGCC           | TCAATGAGCAGCACCTTGCC           |
| <i>Cat</i>    | Catalase                                                             | CCAGCGACCAGATGAAGCAG           | CCACTCTCTCAGGAATCCGC           |
| <i>Sod1</i>   | Superoxide dismutase 1                                               | GCATGGGTTCCACGTCCATC           | ACCGTCCTTTCCAGCAGTCA           |
| <i>Sod2</i>   | Superoxide dismutase 2                                               | GGCCAAGGGAGATGTTACAA           | GAACCTTGGAATCCCACA             |
| <i>Nox2</i>   | NADPH oxidase 2                                                      | CACGCATGCCTTTGAGTGGT           | TGGGCCGTCCATACAGAGTC           |
| <i>Nox4</i>   | NADPH oxidase 4                                                      | ACCCATTTACTCTCACAATGTGTCC      | GACTTGATGGAGGCAGTAGCAAAT       |
| <i>P47</i>    | P47 phagocyte oxidase                                                | GATGTTCCCCATTGAGGCCG           | GTTTCAGGTCATCAGGCCGC           |
| <i>Nos2</i>   | Inducible nitric oxide synthase                                      | CTCAGCCCCAACAATACAAGAT         | TGTGGTGAAGAGTGTGATGCA          |
| <i>Arg1</i>   | Arginase 1                                                           | CTCCAAGCCAAAGTCCCTAGA          | AGGAGCTGTCATTAGGGACAT          |
| <i>Pdx1</i>   | Pancreatic and duodenal homeobox 1                                   | GAACCCGAGGAAAACAAGAGG          | GTTCAACATCACTGCCAGCTC          |
| <i>Neurod</i> | Neuronal Differentiation 1                                           | GCCCAGCTTAATGCCATCTTT          | CAAAAGGGCTGCCTTCTGTAA          |
| <i>Hnf4a</i>  | Hepatocyte Nuclear Factor 4 Alpha                                    | ATGACACGTCCCCATCTGAAG          | CTCGAGGCTCCGTAGTGTGTTG         |
| <i>Uro3</i>   | Urocortin 3                                                          | GGAGGTCCAAGGACAAGCCT           | TGCTGTGCCTGGGATTGGTA           |
| <i>Cx36</i>   | Connexin 36                                                          | AGTTCTCCGTCTCCCCATCTC          | CCTCTAATCCGCCCTTAAGTA          |
| <i>Ins1</i>   | Insulin-1                                                            | GTCCTCTGGGAGCCCCAAG            | ACAGAGCCTCCACCAGG              |
| <i>Ins2</i>   | Insulin-2                                                            | ATCCTCTGGGAGCCCCGC             | AGAGAGCTTCCACCAAG              |
| <i>36B4</i>   | 60S Acidic Ribosomal Protein P0                                      | AGATGCAGCAGATCCGCAT            | GTTCTTGCCCATCAGCACC            |

| <b>Primers used for genotyping</b>           |                   |                              |                               |
|----------------------------------------------|-------------------|------------------------------|-------------------------------|
| Cre                                          | Cre recombinase   | TGCAAGTTGAATAACCGGAAA        | CTAGAGCCTGTTTTGCACGTT         |
| Primer set 1                                 |                   | ACTCAACCTAGGGCCTTGTG         | GGGAGCATTCTGAAAAATAA          |
| Primer set 2                                 |                   | ACTCAACCTAGGGCCTTGTG         | GACTTACCCTCCACGACAGC          |
| <b>Primers used for mtDNA content assays</b> |                   |                              |                               |
| mtDNA                                        | Mitochondrial DNA | CCCAGCTACTACCATCATTCAAG<br>T | GATGGTTTGGGAGATTGGTTGATG<br>T |
| 18S                                          | 18S ribosomal RNA | AGTCCCTGCCCTTTGTACACA        | GATCCGAGGGCCTCACTAAAC         |
